# Supplementary material for: Non-Renal Effects and the Risk Assessment of Environmental Cadmium Exposure
Source: PubMed Central journal article supplement (PMC4014752; doi:10.1289/ehp.1307110), 2014-02-25
Supplement: ehp.1307110.s001.pdf [file ehp.1307110.s001.pdf]

**Supplemental Material**

**Non-Renal Effects and the Risk Assessment of Environmental  
Cadmium Exposure**

Agneta Åkesson, Lars Barregard, Ingvar A. Bergdahl, Gunnar F. Nordberg, Monica Nordberg,  
and Staffan Skerfving

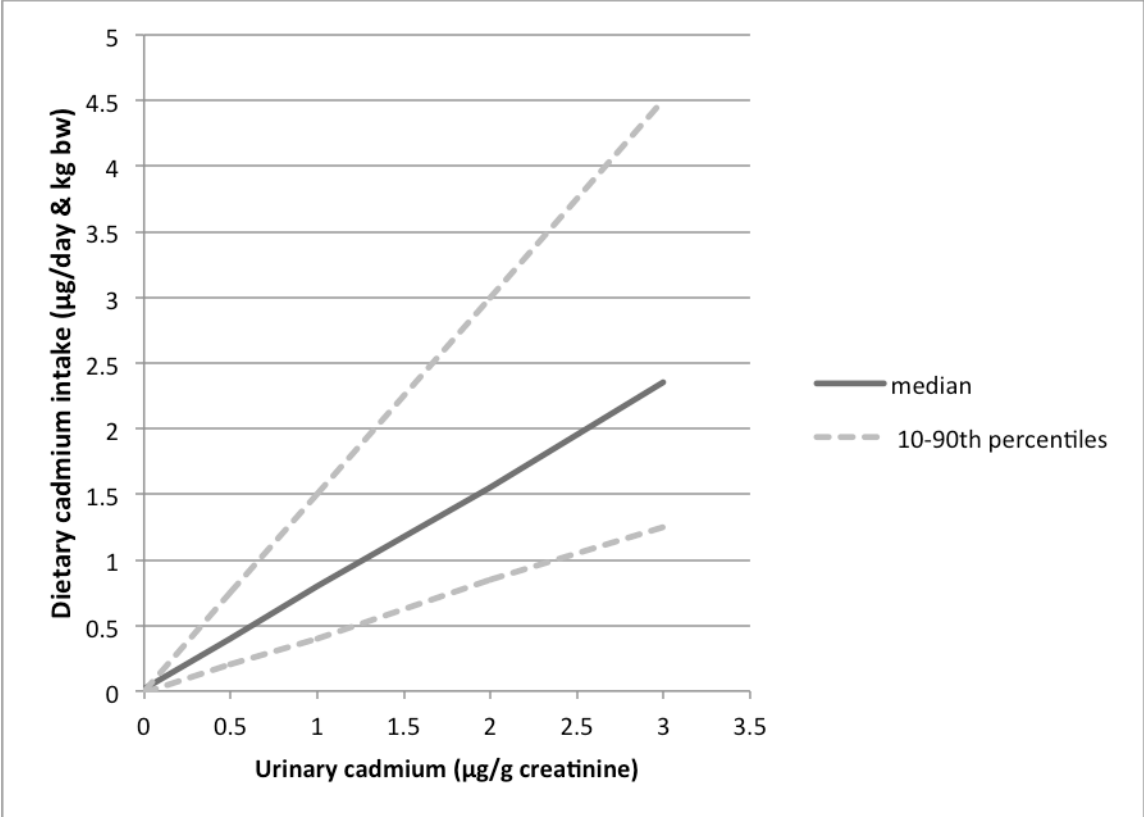

**Figure S1.** Modeled distribution of long-term dietary cadmium exposure corresponding to urinary cadmium concentrations at age 50 in never-smoking women (based on data from Amzal et al. 2009).

## Reference

Amzal B, Julin B, Vahter M, Wolk A, Johanson G, Akesson A. 2009. Population toxicokinetic modeling of cadmium for health risk assessment. *Environ Health Perspect* 117:1293-1301
